# Supplementary material
Source: ML conference proceedings conference paper supplement (https://openreview.net/forum?id=S9Y89poypx)

# Model Learning Curves

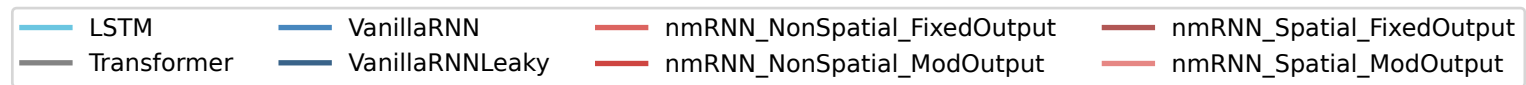

Pre-training

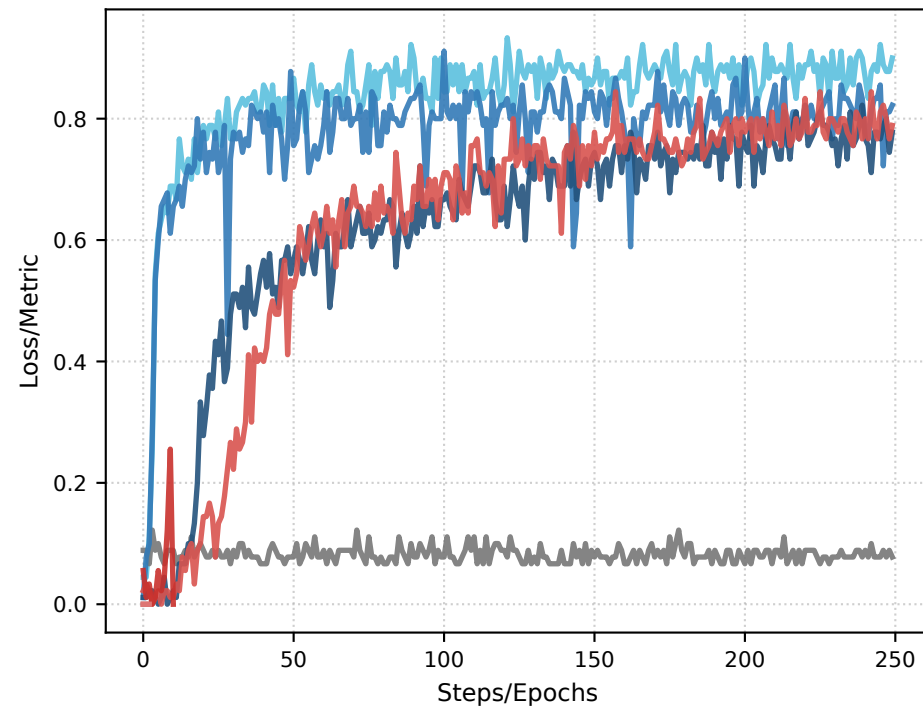

yang19.ctxdlydm1-v0

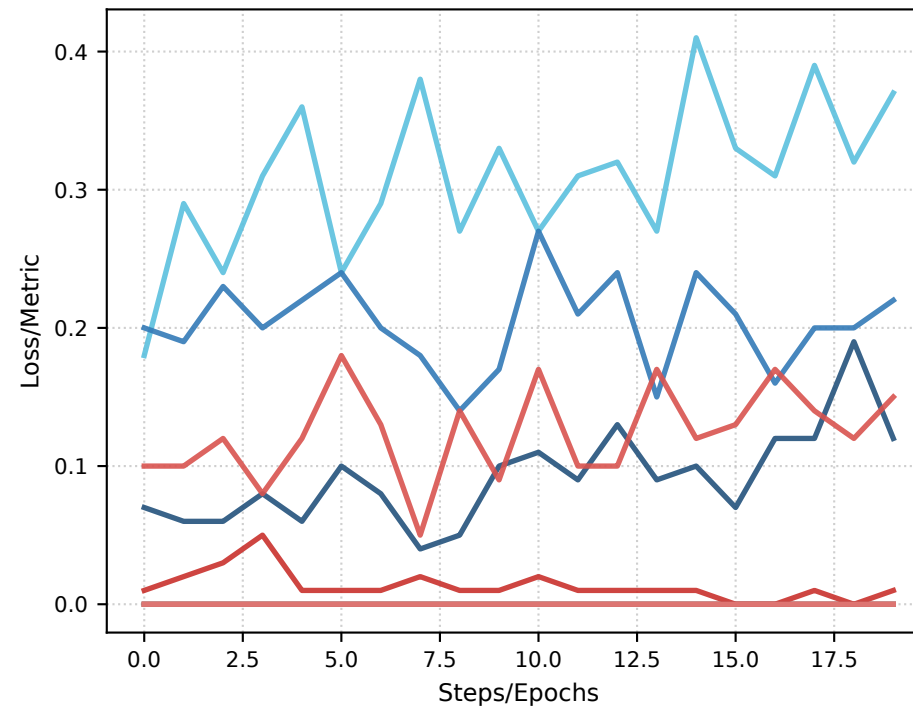

yang19.ctxdm1-v0

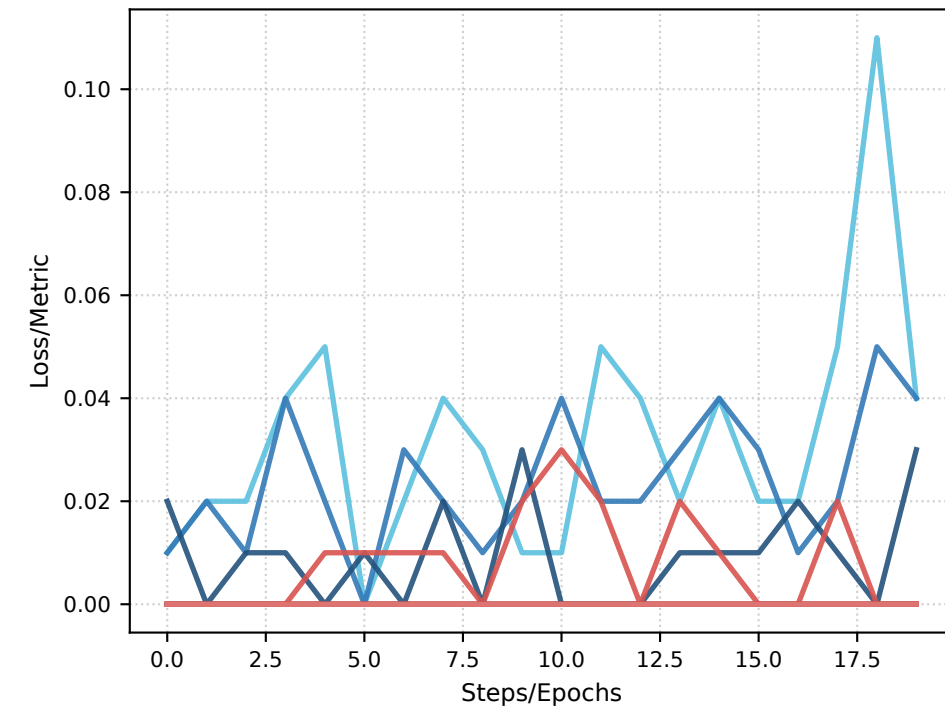

yang19.dlydm2-v0

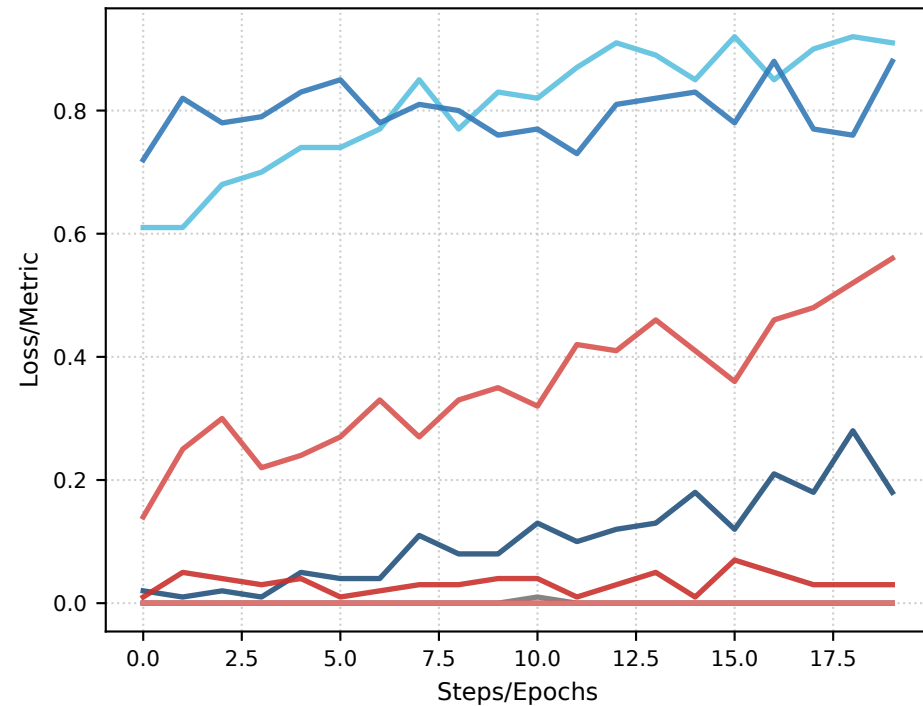

yang19.multidlydm-v0

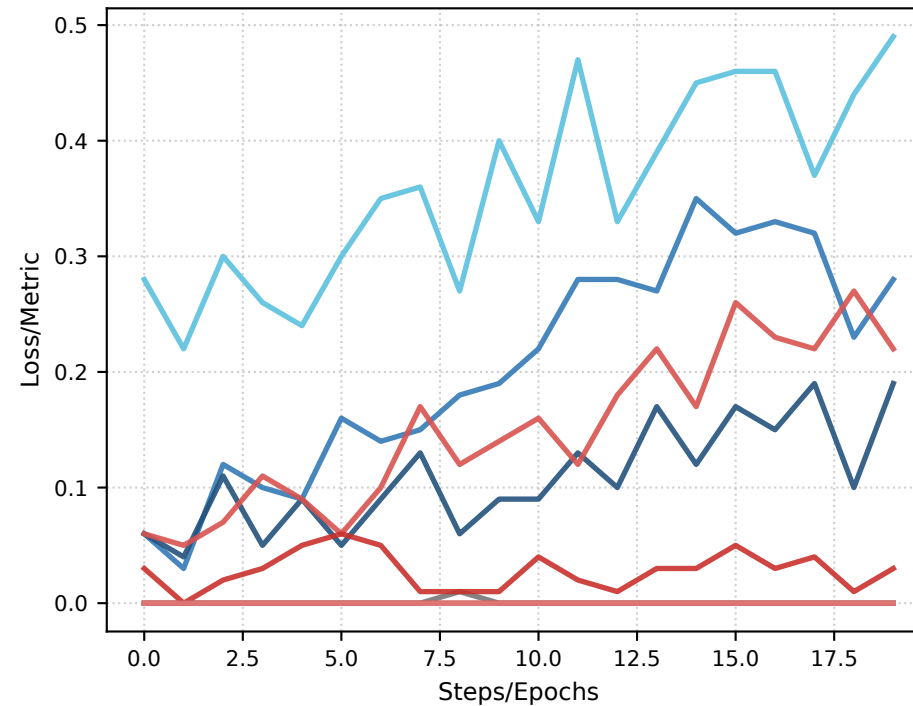

yang19.rtgo-v0

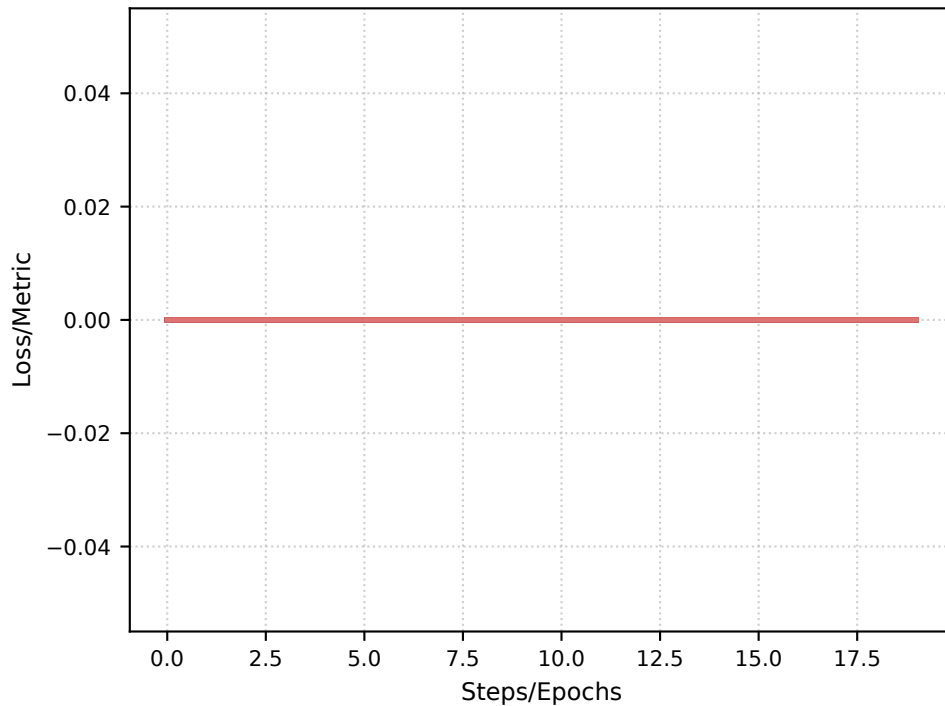

Supplement: supplementary_material [file Transfer_CompositionalContext4_NNM4_tau0p05_hs256_lrM0p001_lrCCFT0p001_pre50000_ft1000combined_learning_curves_v2.pdf › ANON_Final_neurips_submission_repo/Fig5 - Multitasking/NeuroGym_Adaptability-InDevelopment/Transfer_CompositionalContext4_NNM4_tau0p05_hs256_lrM0p001_lrCCFT0p001_pre50000_ft1000combined_learning_curves_v2.pdf]
