# Supplementary material
Source: ML conference proceedings conference paper supplement (https://openreview.net/forum?id=S9Y89poypx)

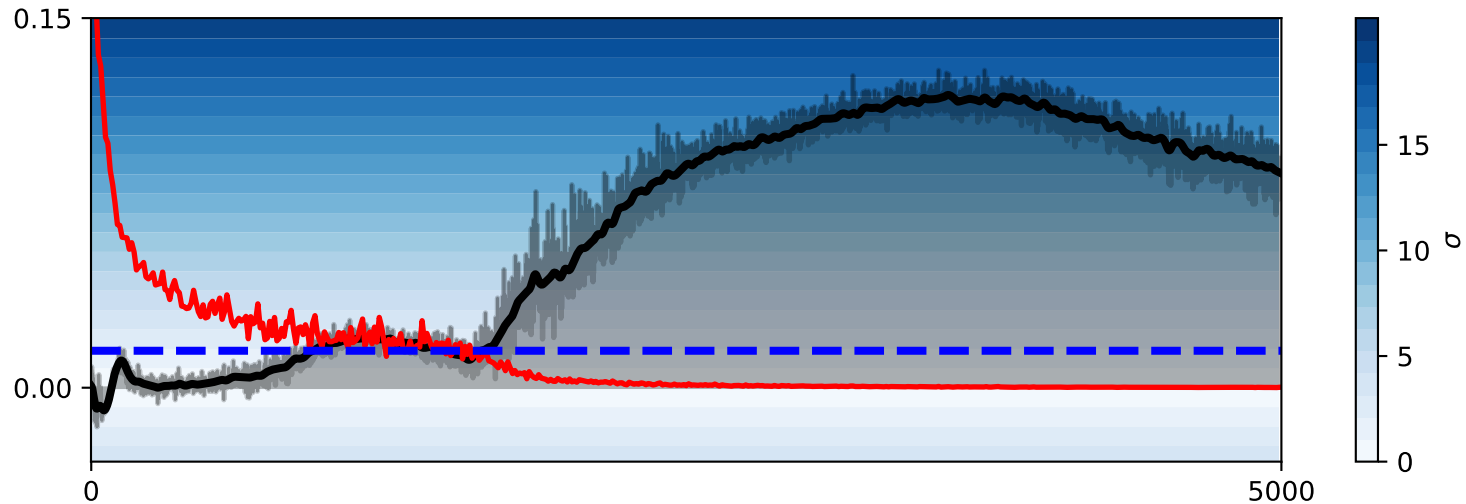

Supplement: supplementary_material [file CosineSimilairtyBWgradAndDynamics_OverTraining.pdf › ANON_Final_neurips_submission_repo/Fig2 - Hopf MetaLearning/v3_refactor/Hopf_experiments_new/NM4_H128_20250513-231758/logs/CosineSimilairtyBWgradAndDynamics_OverTraining.pdf]

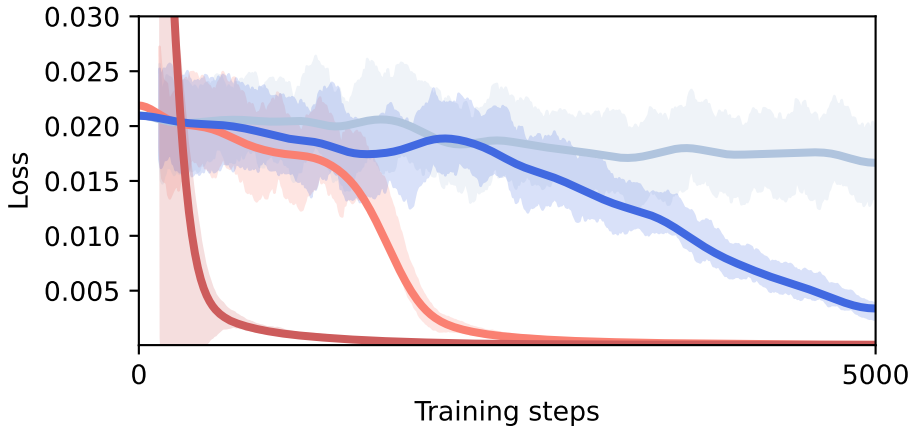

Supplement: supplementary_material [file loss_comparison_linear.pdf › ANON_Final_neurips_submission_repo/Fig2 - Hopf MetaLearning/v3_refactor/Hopf_experiments_new/NM4_H128_20250513-231758/logs/loss_comparison_linear.pdf]

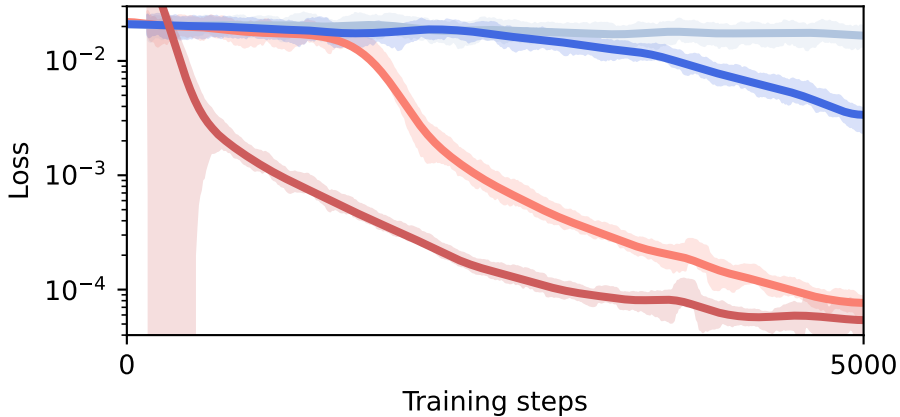

Supplement: supplementary_material [file loss_comparison_log.pdf › ANON_Final_neurips_submission_repo/Fig2 - Hopf MetaLearning/v3_refactor/Hopf_experiments_new/NM4_H128_20250513-231758/logs/loss_comparison_log.pdf]

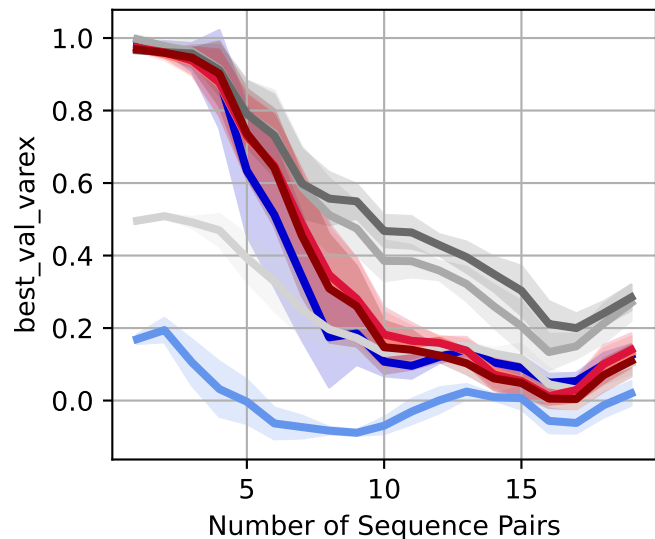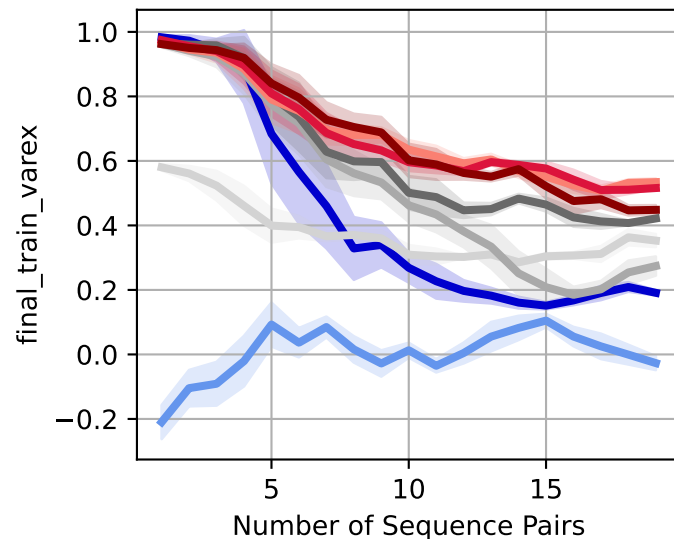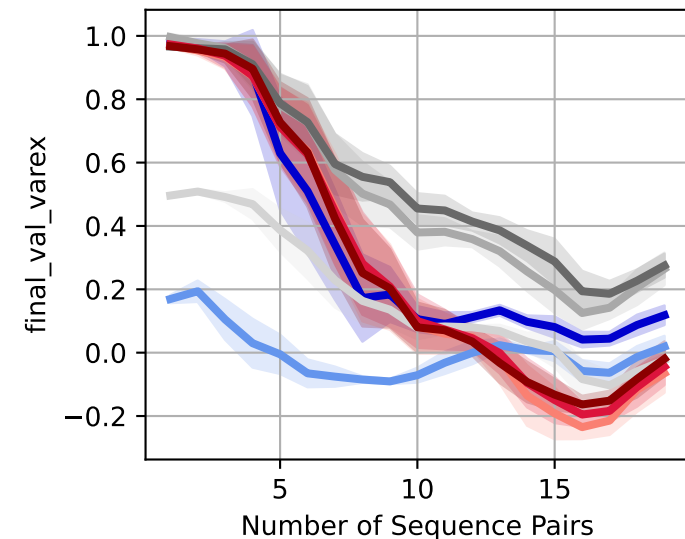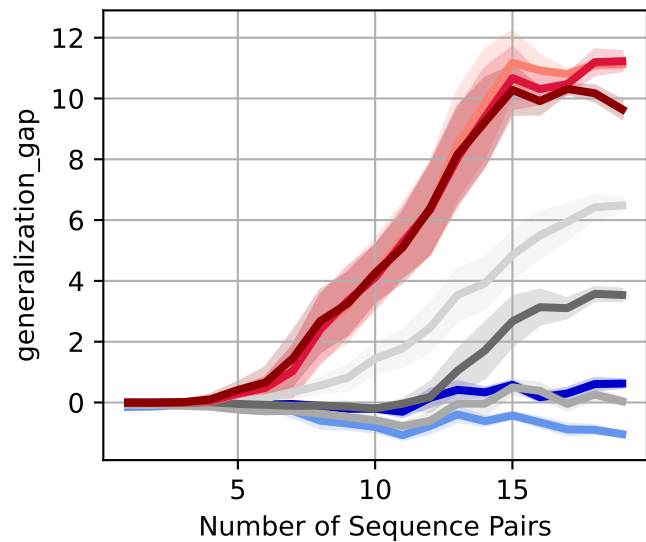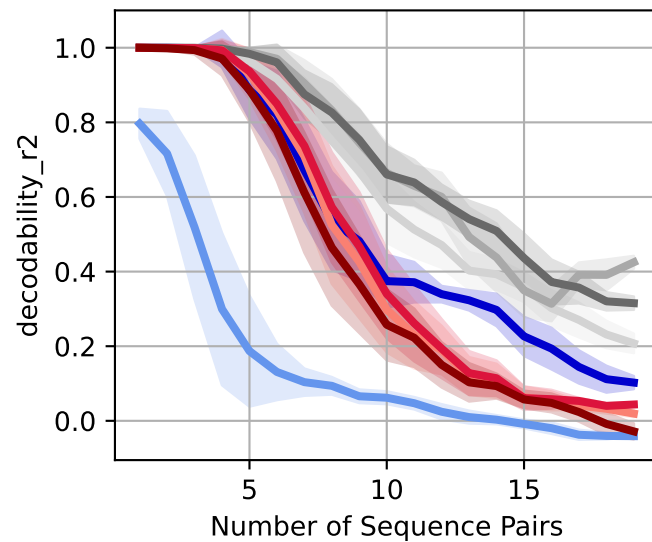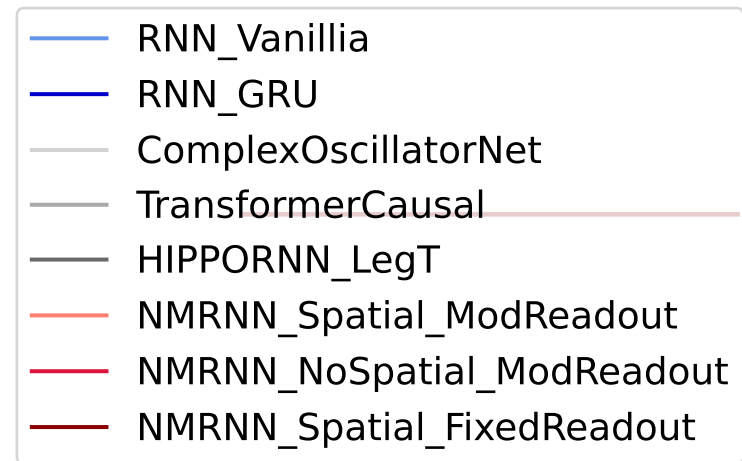

Supplement: supplementary_material [file analysis_ComplexitySweep220250512_021031.pdf › ANON_Final_neurips_submission_repo/Fig3 - Compositional Generalization/analysis_ComplexitySweep220250512_021031.pdf]

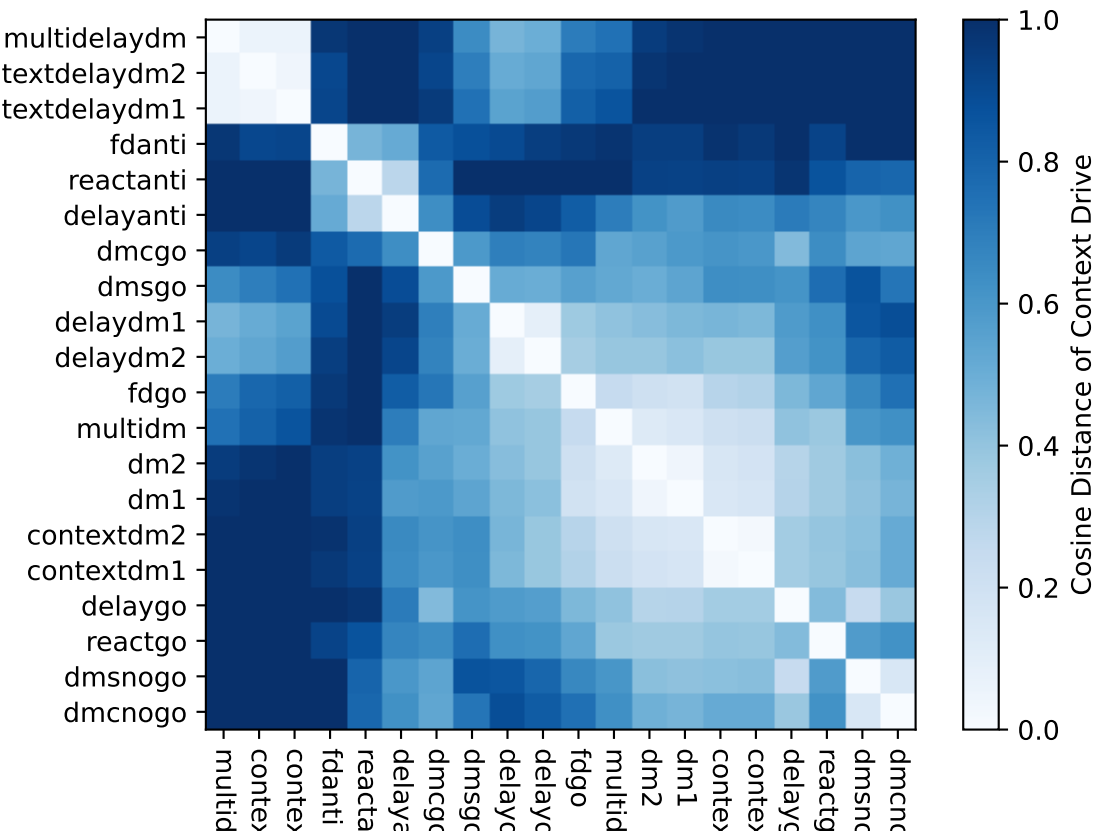

Supplement: supplementary_material [file DistancesBetweenTaskConditioningVectors.pdf › ANON_Final_neurips_submission_repo/Fig5 - Multitasking/Yang19MultitaskingAll/DistancesBetweenTaskConditioningVectors.pdf]
